# Supplementary material for: The Medical Library Association Encyclopedic Guide to Searching and Finding Health Information on the Web
Source: Frontiers journal article supplement (doi:10.3389/fmicb.2021.695572), 2005-01-01
Supplement: Data_Sheet_1.PDF [file Data_Sheet_1.PDF]

### **Construction of *M. genitalium* mutants**

***pmraZWTcTer***. This suicide plasmid was used to create a strain carrying the tetracycline resistance marker in the same location as the *mraZ* and *mraW* mutants, for control purposes. The upstream region of *mraZ* was amplified by PCR with the oligonucleotides *mraZ Upstream F* and *mraZ Upstream R*. The downstream region was amplified using *mraW Downstream F* and *mraW Downstream R* as primers. The resistance marker with the transcription terminator at its 3' end was amplified from the pMG\_236 plasmid<sup>1</sup> using the *TetTer-5'* and *TetTer-3'* oligonucleotides. These oligonucleotides had overlapping regions with the *mraZ* promoter and the *mraZ* upstream region, respectively, to allow the total amplification of the different fragments by SOE-PCR. The second fragment was amplified with the *mraZProm (Dw-F)* and *mraW Downstream R* oligonucleotides. The upstream region was put together with the marker using the *mraZ Upstream F* and *TetTer-5'* primers and the downstream region was merged with the antibiotic resistance gene using the *TetTer-3'* and *mraW Downstream R* oligonucleotides. Both regions were later amplified together with *mraZ Upstream F* and *mraW Downstream R* as primers. The whole amplicon was cloned into an *EcoRV*-digested pBE plasmid<sup>2</sup> and transformed into *M. genitalium*. The terminator sequence is present between the metal acquisition operon (MG\_304-MG\_302) and the *dnaK* gene (MG\_305) and was identified using the TransTermHP software<sup>3</sup>.

***pΔmraZ***. This plasmid was used to generate a *M. genitalium mraZ* null mutant by homologous recombination (HR). It was constructed similarly to *pmraZWTcTer*. It contained the same upstream and downstream regions, but it lacked the *mraZ* ORF. The promoter region was just upstream from *mraW* thanks to a large oligonucleotide (*mraW Prom-F*) that annealed with the 5' of *mraW* in its 3' end and contained an 80+ nucleotide long 5' tail that annealed with the immediate upstream region of the *mraZ* gene. Thus, the putative regulatory region was preserved to ensure that the possible phenotypical effects associated with the strain were directly related to the loss of *mraZ*. The upstream region and the tetracycline resistance marker were amplified as stated in the *pmraZWTcTer* plasmid (amplified using the *mraZ Upstream F* and *TetTer-5'* oligonucleotides). The *mraW* gene and the downstream region were amplified using the *mraWProm-F* and *mraW Downstream R* primers. Then, the two fragments could be

merged because of the sequence overlap created by the *TetTer-5'* oligonucleotide, which contained a tail complementary to the regulatory region of *mraZ* that was present in the second fragment because of the *mraWProm-F* oligonucleotide. Thus, the final product was amplified using again the *mraZ Upstream F* and *mraW Downstream R* oligonucleotides. This was cloned into an *EcoRV*-digested pBE and transformed into *M. genitalium*.

***pΔmraW***. This plasmid was used to generate a *M. genitalium mraW* null mutant by homologous recombination (HR). The upstream region and the tetracycline resistance marker were amplified as described above. As for the *mraZ* and downstream fragment, an oligonucleotide (*mraZ-R*) containing the 3' end of *mraZ* and a tail complementary to the 5' end of the MG\_223 gene was used. So, in order to put the MG\_223 gene just downstream of the *mraZ* stop codon, the *mraZ* ORF and its promoter region were amplified with the *mraZProm (Dw-F)* and *mraZ-R* oligonucleotides; and 1 kb of the MG\_223 gene was amplified as usually with the *mraW Downstream F* and *mraW Downstream R* primers. Then, as the 3' end of the *mraZ* product was complementary to the 5' of the MG\_223 fragment, both fragments were merged using the *mraZProm (Dw-F)* and *mraW Downstream R* oligonucleotides. As for the upstream part, it was amplified using the *mraZ Upstream F* and *mraZ-R* oligonucleotides, as the *TetTer-5'* oligonucleotide had a tail complementary to the regulatory region of *mraZ*, as stated previously. Finally, the whole fragment was put together with the *mraZ Upstream F* and *mraW Downstream R* primers. Then, it was cloned into an *EcoRV*-digested pBE and transformed into the *M. genitalium*.

***pdcw***. This construction was used to delete the whole division and cell wall operon of *M. genitalium*. The *mraZ* upstream region was amplified using the *mraZ* upstream F and *mraZ* upstream R primers. The downstream region was amplified using the *mg224-Dw-F* and *mg224-Dw-R(Cm)* oligonucleotides. The 3' of the first fragment and the 5' of the second fragment overlapped with the 5' and 3' of the *cat* marker, respectively. The chloramphenicol resistance was amplified using the *Cm-F* and *Cm-R* primers. Then, the three fragments were fused together with SOE-PCR. As the first fragment (*mraZ* upstream region) ends at 80 bp of the *mraZ* ORF, the *mraZ* boxes were not present in

this construction. The whole fragment was cloned into an *EcoRV*-digested pBE and later transformed into the G37 strain.

***pMG223***. This construction was aimed to obtain a MG\_223 null mutant by HR. The upstream region was amplified using *MG223 (Up-F)* and *MG223 (Up-R)* primers. The downstream region was amplified with another pair of oligonucleotides: *MG223 (Dw-F)* and *MG223 (Dw-R)*. *MG223 (Up-R)* and *MG223 (Dw-F)* had an overhang end at their 3' and 5' ends, respectively, that overlapped with the 5' and 3' ends of the *cat* resistance. The chloramphenicol resistance was amplified using the *Cm-F* and *Cm-R* primers and then the three fragments were fused together using SOE-PCR. The fragment was cloned into an *EcoRV*-digested pBE and later transformed into the G37 strain.

***pftsZ***. This construction was aimed to obtain a single knockout of the *ftsZ* gene. The upstream and downstream regions of *ftsZ* were amplified using two pairs of oligonucleotides: *mraW(Dw-F)* and *223p438(XhoI)-R* for the upstream region and *mg224-Dw-F* and *mg224-Dw-R(Cm)* for the downstream fragment. The *CmR* was amplified with the *Cm-F* and *Cm-R* primers, as already described. The 3' of the first fragment and the 5' of the second fragment overlapped with the 5' and 3' of the *cat* resistance, respectively. Thus, all three fragments were joined together with SOE-PCR and cloned into an *EcoRV*-digested pBE. This construction was transformed into the G37 strain.

***pftsZCh***. This construction was created to fuse a fluorescent reporter to FtsZ by HR. The *ftsZ* gene was amplified with the *mg224-F(cherry)* and *mg224-R(cherry)* oligonucleotides. Then, the downstream region (which contained an intergenic region between *ftsZ* and MG\_225 and a part of MG\_225) was also amplified using the *mg224-Dw-F* and *mg224-Dw-R(Cm)* primers. The *mg224-R(cherry)* and *mg224-Dw-F* contained an overhang end that overlapped with the 5' of the *mcherry* reporter and the 3' of the *cat* resistance marker, respectively. The *mcherry* and *cat* cassette was amplified from the pMG\_428:Ch plasmid<sup>3</sup> with the Cherry-F and Cm-R oligonucleotides. Then, the three fragments were joined by SOE-PCR and cloned into an *EcoRV*-digested pBE and later transformed into the G37, *mraZ* and *mraW* strains.

**p217YFP.** This construction was created to fuse the eYFP fluorescent marker to the MG\_217 gene by HR. The upstream region was amplified using the *mg217-YFP-F* and *mg217-YFP-R* oligonucleotides, and the downstream region was also amplified by PCR with the *mg217Dw-PAC-F* and *mg217Dw-R* primers. In this case, the cassette containing the eYFP and *pac* markers was amplified from the pTnMG\_428:YFP plasmid<sup>5</sup> using the *YFP-F* and *Pac-R* (*Bam*HI) oligonucleotides. The three fragments were then fused by SOE-PCR, as the *mg217-YFP-R* and *mg217Dw-PAC-F* oligonucleotides contained an overhang that overlapped with the 5' of the eYFP marker and the 3' of the puromycin resistance, respectively. Then, this construction was cloned into an *Eco*RV-digested pBE and later transformed into the *mraZ* strain.

**pMTnCatmraZ.** This plasmid contains a minitransposon carrying a wild-type copy of the *mraZ* allele under the control of its own promoter. It was used to restore the phenotype of the *mraZ* mutant. The *mraZ* ORF was amplified with *MG221P221-F*(*Apal*) and *COMmg221-R*(*Xho*I) primers from gDNA of *M. genitalium*. Then, the fragment was digested with *Xho*I and *Apal* and cloned into an equally digested *pMTnCat* plasmid<sup>6</sup>. Finally, the construction was transformed into the *mraZ* strain.

**pMTnCatmraZW.** This plasmid contains a minitransposon carrying wild-type copies of *mraZ* and *mraW* under the control of its own promoter. The two alleles were amplified from gDNA of *M. genitalium* with *MG221P221-F*(*Apal*) and *COMmg222-R*(*Xho*I) primers. The fragment was later digested with *Xho*I and *Apal* and ligated into a digested *pMTnCat* plasmid. This plasmid was transformed into the *mraZ* strain.

**pmraZCOM.** This plasmid was used to restore the *mraZ* phenotype by placing a *mraZ* copy after the *ftsZ* gene by HR. The upstream region (*ftsZ*) was amplified using the *mg224-F*(*cherry*) and the *224mraZ-R* primers. This last oligonucleotide overlapped with the 3' of *ftsZ* and it left a hanging 3' end which was complementary to the 5' of *mraZ*. Then, we amplified the *mraZ* + *CmR* construction from *pMTnCatmraZ*. This amplification was done using the *mraZ-F* and *Cm-R* primers. The last part of the construct contained the downstream region of *ftsZ* (a short intergenic region of 45 bp and a large part of MG\_225) and it was amplified by PCR using the *mg224-Dw-F*(*Cm*) and *mg224-Dw-R*(*Cm*) oligonucleotides. The *mg224-Dw-F*(*Cm*) oligonucleotide had a 5' hanging end which

overlapped with the 3' end of *CmR*. All three parts were fused together using SOE-PCR and cloned into an *EcoRV*-digested pBE and later transformed into the *mraZ* mutant.

### **Mutant screening**

All the defective strains in this study were screened using Next Generation Sequencing (NGS). We extracted the genomic DNA of each strain and then we obtained libraries for each sample using MiSeq 2x150 flowcells. Next, we performed alignments for each library against their respective reference genome. The alignments showed the absence of large genome rearrangements different to those intended for each mutant (data not shown). We also investigated the presence of small variants like SNPs or INDELS in the alignments. All the strains showed the presence in variable frequencies of a few variants, many of them also found in the G37 strain. However, several variants were not identified in the G37 strain. Most of these new variants were mainly located in MgPar regions. These MgPar regions are repeated regions scattered in the genome that are involved in the generation of antigenic diversity by recombining among them and also with the homologous sequences in the MgPa operon, coding for the main adhesins of *M. genitalium* (Table S3). We consider that the presence of SNPs and INDELS in these regions is a mere consequence of the different passages between the parental G37 strains and the obtained mutant strains. The variable frequencies of these variants might be also a consequence that all mutant strains were derived by colony picking after the transformation experiments.

**Table S1.** Strains used in this study.

| Strain name               | Genotype                                                                                                                       | Reference                                |
|---------------------------|--------------------------------------------------------------------------------------------------------------------------------|------------------------------------------|
| G37                       | Wild-type                                                                                                                      | ATCC 33530                               |
| <i>mraREF</i>             | <i>tetM</i>                                                                                                                    | This work                                |
| <i>mraZ</i>               | $\Delta$ MG_221:: <i>tetM</i>                                                                                                  | This work                                |
| <i>mraW</i>               | $\Delta$ MG_222:: <i>tetM</i>                                                                                                  | This work                                |
| MG_223                    | $\Delta$ MG_223:: <i>cat</i>                                                                                                   | This work                                |
| <i>ftsZ</i>               | $\Delta$ MG_224:: <i>cat</i>                                                                                                   | This work                                |
| <i>dcw</i>                | $\Delta$ MG_221:: <i>cat</i> , $\Delta$ MG_222:: <i>cat</i> ,<br>$\Delta$ MG_223:: <i>cat</i> , $\Delta$ MG_224:: <i>cat</i> . | This work                                |
| <i>mraZCOM</i>            | $\Delta$ MG_221:: <i>tetM</i> , <i>cat</i> .                                                                                   | This work                                |
| <i>mg191</i>              | $\Delta$ MG_191:: <i>tetM</i>                                                                                                  | Burgos <i>et al.</i> , 2006 <sup>7</sup> |
| G37 <i>ftsZCh</i>         | <i>cat</i> , <i>ftsZ:mcherry</i>                                                                                               | This work                                |
| <i>mraZftsZCh</i>         | $\Delta$ MG_221:: <i>tetM</i> , <i>cat</i> , <i>ftsZ:mcherry</i>                                                               | This work                                |
| <i>mraWftsZCh</i>         | $\Delta$ MG_222:: <i>tetM</i> , <i>cat</i> , <i>ftsZ:mcherry</i>                                                               | This work                                |
| <i>mg191 ftsZCh</i>       | $\Delta$ MG_191:: <i>tetM</i> , <i>cat</i> , <i>ftsZ:mcherry</i>                                                               | This work                                |
| <i>mraZ ftsZCh 217YFP</i> | $\Delta$ MG_221:: <i>tetM</i> , <i>cat</i> , <i>ftsZ:mcherry</i> ,<br><i>pac</i> , MG_217: <i>eyfp</i>                         | This work                                |
| <i>mraZ TnMraZ</i>        | $\Delta$ MG_221:: <i>tetM</i> , TnCmMG_221                                                                                     | This work                                |
| <i>mraZ TnMraZW</i>       | $\Delta$ MG_221:: <i>tetM</i> ,<br>TnCmMG_221:MG_222                                                                           | This work                                |

**Table S2.** Primers used in this study.

|         | Primer name             | Sequence (5'-3')                                                                                                    |
|---------|-------------------------|---------------------------------------------------------------------------------------------------------------------|
| Mutants | mraZ Upstream F         | GTTACACCTACTAACAACAC                                                                                                |
|         | mraZ Upstream R         | TTTATTAATTCTAAATACTACAATTCTACAACCTAAATTAACCCTTG                                                                     |
|         | mraW Downstream F       | CGATGAGTGGCAGGGCGGGGCGTAAATGTACAAACCAAAAAATATTAA                                                                    |
|         | mraW Downstream R       | TTGATAAGTGCAACATTAGC                                                                                                |
|         | TetTer-3'               | CAAGGGTTAATTTAAGTTGTAGCTCGAGCTAAAAATCTGTTTTTTGGT                                                                    |
|         | TetTer-5'               | CTTTTGTCCAAAAATGAAATGAATTCTAGTATTTAGAATTAATAAAG                                                                     |
|         | mraZ-F                  | ATGCTGCTAGGTACCTTTAATC                                                                                              |
|         | mraZ Up-R               | CTACAACCTAAATTAACCCTTG                                                                                              |
|         | mraZProm(Dw-F)          | TCATTTTCATTTTGGACAAAAAG                                                                                             |
|         | mraW-F                  | TCATTTTCATTTTGGACAAAAAGAAATTTTTATGCTAAGATAAAAGTGT<br>TTAAAAGTGTCGCAAAGTGTGACAAAGTGGAATAATGCTAAATAACC<br>AACAGATC    |
|         | mraZ-R                  | ATATTTTTTGGTTTGTACATTTATTTAGCATCTTTCATCC                                                                            |
|         | mraW(Dw-F)              | ATGTACAAACCAAAAAATATTAAC                                                                                            |
|         | mraW+Prom(Dw-F)         | TCATTTTCATTTTGGACAAAAAGAAATTTTTATGCTAAGATAAAAGTGT<br>TTAAAAGTGTCGCAAAGTGTGACAAAGTGGAATAATGTACAAACCAA<br>AAAATATTAAC |
|         | Tc-F (or Cm-F or Pac-F) | CTCGAGTAGTATTTAGAATTAATAAAG (sequence of the MG_438 promoter)                                                       |
|         | Cm-R                    | TTACGCCCCGCCCTGCCAC                                                                                                 |
|         | 223p438(XhoI)-R         | AATTCTAAATACTACTCGAGAGTTATTTAACCAAGCGTTGG                                                                           |
|         | mg224-F(cherry)         | CACTATCCTAATTTAGCAAGTG                                                                                              |
|         | mg224-DW-F(Cm)          | GTGGCAGGGCGGGGCGTAAATTAATTTAATTTATCGTTTAGAATTGC                                                                     |
|         | mg224-DW-R(Cm)          | CTTTCTGGAGTTGGCAATAATAG                                                                                             |
|         | 224mraZ-R               | GATTAAAGGTACCTAGCAGCATATTAGTAGATTTGGTTTTGGTGC                                                                       |
|         | mg217-YFP-F             | CAGCAATTTAATCAACCAGG                                                                                                |
|         | mg217-YFP-R             | CAGCTCCTCGCCCTTGCTCACGTTATTGTTATTGTTATTGTTATTTTC<br>ATAGAAGTCATCACGGTAA                                             |
|         | mg217Dw-PAC-F           | CTAGAAAACCTGGTGCTTAAAAAGCGTGTTTTAACTAATGAAA                                                                         |
|         | mg217Dw-R               | TAAGTTGTTTAGCTACATCATC                                                                                              |
|         | Pac-R (BamHI)           | GCGGGATCCTTAAGCACCAGGTTTTCTAG                                                                                       |
|         | YFP-F                   | ATGGTGAGCAAGGGCGAGGA                                                                                                |
|         | MG223 (Up-F)            | GTAGCTGAAAGGATGAAAGATG                                                                                              |
|         | MG223 (Up-R)            | GTTCAATAAAAAATACTTAGGGATCCTAGTTTTTTTTGGATAACAAAGAG                                                                  |

|            |                   |                                                  |
|------------|-------------------|--------------------------------------------------|
|            | MG223 (Dw-F)      | TTTATTAATTCTAAATACTACTCGAGTAACTATGGATGAAAATGAAAC |
|            | MG223 (Dw-R)      | ATATTAGGGATGGTTGTCACAAAATC                       |
|            | MG221P221-F(ApaI) | ATTGGGCCCCAAGGGTTAATTTAAGTTGTAGTC                |
|            | COMmg221-R(XhoI)  | ATTCTCGAGTTATTTAGCATCTTTCATCCTTTC                |
|            | COMmg222-R(XhoI)  | ATTCTCGAGCTAGTTTTTTTTGGATAACAAAGAGC              |
| Screening  | mg220(Up-F)       | GTGATCCTGATCCAATCCAA                             |
|            | mg226(Up-R)       | ATTAATTCTAAATACTATCTAGAGCCCAACATCAAACATGGTC      |
| qRT-PCR    | RTPCRmg177-F      | TGAGTGTCCAGCTGGTTTTG                             |
|            | RTPCRmg177-R      | AACCGGGGAAAAGTTAGCAT                             |
|            | RTPCRmg418-F      | TGTTGACGCTAGTGGTTTGG                             |
|            | RTPCRmg418-R      | TTCCACCCATGTATTGAGAGTG                           |
|            | RTPCRmg430-F      | GGAAGCAGTTGGATTGCCTA                             |
|            | RTPCRmg430-R      | ATGCACTCCTCCATTGGAAA                             |
|            | RTPCRmg221-F      | CCTTGATAACAAGAACAGAA                             |
|            | RTPCRmg221-R      | GGAAGTTATTAAAGGTTTGAAA                           |
|            | RTPCRmg222-F      | AGGGTTTGCAGGACACAGTC                             |
|            | RTPCRmg222-R      | TCCCATCAAACCTGGTTATTGA                           |
|            | RTPCRmg223-F      | TGATGATCAAAACCAGTTCAACA                          |
|            | RTPCRmg223-R      | TCAGTTCAGCGAGAACAAACAA                           |
|            | RTPCRmg224-F      | GGATGAAAATGAAACTCAATTC                           |
|            | RTPCRmg224-R      | CTTGCTAAATTAGGATAGTGATAA                         |
| Sequencing | Fup-24            | CGCCAGGGTTTTCCCAGTCACGAC                         |
|            | Rup-24            | TCACACAGGAAACAGCTATGACCA                         |
|            | TetUp             | TTCTTGCATCAACATGAG                               |
|            | TetDown           | GTCGTCCAAATAGTCGGA                               |
|            | CmUp              | CAACGGTGGTATATCCAG                               |
|            | CmDown            | CAGTACTGCGATGAGTGGCA                             |
|            | PacUp             | GTAGCTAATCTAACAGTAGG                             |
|            | PacDown           | GTCCTAGAACTTGGTGTATG                             |



**Table S3.** Variants (SNPs and INDELS) detected in the genome of analyzed strains. Illumina reads were aligned to the *M. genitalium* G37 reference genome and variants were detected with the VarScan application (Kobolt *et al.*, 2009)<sup>8</sup>. Only variants passing the strand filter, with a P value <0.001, with more than 20 supporting reads and with a frequency higher than 20% were reported by VarScan. NF: Not found; IGR: Intergenic non-coding region. MgPar refers to the different genome regions involved in the generation of antigenic diversity by recombining with the homologous sequences in the MgPa operon (MgPaOp), which codes for the main adhesins of *M. genitalium*.

| Position | Reference Sequence | Alternative Sequence | Type  | Locus  | Frequency |             |             |        |             |            |                |
|----------|--------------------|----------------------|-------|--------|-----------|-------------|-------------|--------|-------------|------------|----------------|
|          |                    |                      |       |        | G37       | <i>mraZ</i> | <i>mraW</i> | MG_223 | <i>ftsZ</i> | <i>dcw</i> | <i>mraZCOM</i> |
| 22285    | G                  | A                    | SNP   | MG_018 | 27.38     | NF          | 62.16       | NF     | 99.71       | 100        | 27.38          |
| 36790    | T                  | -AA                  | INDEL | IGR    | 38.92     | NF          | NF          | 62.16  | 63.64       | 58.00      | 60.80          |
| 137879   | A                  | T                    | SNP   | MG_110 | 20.12     | NF          | NF          | NF     | NF          | NF         | NF             |
| 137883   | G                  | T                    | SNP   | MG_110 | 27.11     | NF          | NF          | NF     | NF          | NF         | NF             |
| 167981   | C                  | T                    | SNP   | MgPar2 | NF        | NF          | NF          | NF     | NF          | NF         | 20.25          |
| 168014   | A                  | G                    | SNP   | MgPar2 | NF        | NF          | NF          | NF     | NF          | NF         | 65.62          |
| 168017   | A                  | C                    | SNP   | MgPar2 | NF        | NF          | NF          | NF     | NF          | NF         | 63.41          |
| 168030   | T                  | C                    | SNP   | MgPar2 | NF        | NF          | NF          | NF     | NF          | NF         | 46.15          |
| 168032   | A                  | C                    | SNP   | MgPar2 | NF        | NF          | NF          | NF     | NF          | NF         | 44.77          |
| 168036   | G                  | A                    | SNP   | MgPar2 | NF        | NF          | NF          | NF     | NF          | NF         | 32.68          |
| 168037   | C                  | G                    | SNP   | MgPar2 | NF        | NF          | NF          | NF     | NF          | NF         | 31.71          |
| 168041   | G                  | A                    | SNP   | MgPar2 | NF        | NF          | NF          | NF     | NF          | NF         | 29.30          |
| 168042   | T                  | C                    | SNP   | MgPar2 | NF        | NF          | NF          | NF     | NF          | NF         | 27.44          |
| 169475   | A                  | +TAGTAG              | INDEL | MgPar2 | 21.15     | NF          | NF          | NF     | NF          | NF         | NF             |
| 185135   | C                  | A                    | SNP   | MG_146 | 75.16     | 100         | 99.63       | 99.63  | 100         | 100        | 100            |
| 222176   | G                  | C                    | SNP   | MgPaOp | NF        | NF          | NF          | NF     | NF          | 99.73      | NF             |

|        |   |         |       |        |       |       |       |       |       |       |       |
|--------|---|---------|-------|--------|-------|-------|-------|-------|-------|-------|-------|
| 222502 | A | G       | SNP   | MgPaOp | NF    | 86.34 | NF    | 86.94 | NF    | NF    | 85.87 |
| 222505 | G | T       | SNP   | MgPaOp | NF    | 84.73 | NF    | 86.09 | NF    | NF    | 84.94 |
| 222507 | C | -A      | INDEL | MgPaOp | NF    | 82.88 | NF    | 81.69 | NF    | NF    | 80.27 |
| 222508 | A | G       | SNP   | MgPaOp | NF    | 20.78 | NF    | 21.60 | NF    | NF    | 23.33 |
| 222511 | G | +T      | INDEL | MgPaOp | NF    | 70.38 | NF    | 62.38 | NF    | NF    | 62.48 |
| 222512 | A | G       | SNP   | MgPaOp | NF    | 63.24 | NF    | 55.83 | NF    | NF    | 58.56 |
| 222513 | A | G       | SNP   | MgPaOp | NF    | 81.87 | NF    | 82.08 | NF    | NF    | 80.09 |
| 224287 | G | A       | SNP   | MgPaOp | NF    | NF    | NF    | NF    | NF    | NF    | 30.73 |
| 224290 | C | A       | SNP   | MgPaOp | NF    | NF    | NF    | NF    | NF    | NF    | 30.35 |
| 224303 | C | T       | SNP   | MgPaOp | NF    | NF    | NF    | NF    | NF    | NF    | 26.32 |
| 224305 | C | A       | SNP   | MgPaOp | NF    | NF    | NF    | NF    | NF    | NF    | 26.68 |
| 224309 | A | G       | SNP   | MgPaOp | NF    | NF    | NF    | NF    | NF    | NF    | 21.43 |
| 224310 | G | C       | SNP   | MgPaOp | NF    | NF    | NF    | NF    | NF    | NF    | 20.96 |
| 224311 | C | A       | SNP   | MgPaOp | NF    | NF    | NF    | NF    | NF    | NF    | 20.64 |
| 224312 | T | C       | SNP   | MgPaOp | NF    | NF    | NF    | NF    | NF    | NF    | 21.63 |
| 224314 | A | G       | SNP   | MgPaOp | NF    | NF    | NF    | NF    | NF    | NF    | 21.46 |
| 224315 | C | T       | SNP   | MgPaOp | NF    | NF    | NF    | NF    | NF    | NF    | 22.12 |
| 224532 | A | +TAG    | INDEL | MgPaOp | NF    | NF    | NF    | NF    | NF    | 65.64 | NF    |
| 227128 | A | -TAGTAG | INDEL | MgPaOp | 36.10 | NF    | NF    | NF    | 24.67 | 22.84 | NF    |
| 349545 | C | T       | SNP   | MgPar8 | NF    | 23.95 | 36.95 | 36.95 | NF    | NF    | 30.52 |
| 349557 | G | A       | SNP   | MgPar8 | NF    | 25.69 | 37.69 | 37.69 | NF    | NF    | 32.69 |
| 349560 | A | G       | SNP   | MgPar8 | NF    | 26.17 | 37.44 | 37.44 | NF    | NF    | 32.60 |
| 349590 | G | A       | SNP   | MgPar8 | NF    | 68.97 | 62.62 | 62.62 | NF    | NF    | 66.38 |
| 349593 | T | G       | SNP   | MgPar8 | NF    | 68.77 | 63.45 | 63.45 | NF    | NF    | 65.92 |
| 349595 | C | +A      | INDEL | MgPar8 | NF    | 65.33 | 55.17 | 55.17 | NF    | NF    | 58.42 |
| 349598 | G | -T      | INDEL | MgPar8 | NF    | 62.96 | 53.94 | 53.94 | NF    | NF    | 55.43 |
| 349600 | G | A       | SNP   | MgPar8 | NF    | 65.04 | 58.78 | 58.78 | NF    | NF    | 58.64 |
| 349601 | G | A       | SNP   | MgPar8 | NF    | 62.20 | 58.13 | 58.13 | NF    | NF    | 57.31 |

|        |   |                        |       |        |       |       |       |       |       |       |       |
|--------|---|------------------------|-------|--------|-------|-------|-------|-------|-------|-------|-------|
| 429304 | A | -TAGTAG                | INDEL | MgPar9 | NF    | 40.00 | 34.55 | 34.55 | NF    | NF    | 36.25 |
| 429966 | C | -CTTCTTCTTCTTCTT       | INDEL | MgPar9 | 48.08 | NF    | 21.36 | 21.36 | NF    | NF    | NF    |
| 429993 | T | -CTTCTTCTTCTTCTTCTTCTA | INDEL | MgPar9 | NF    | NF    | NF    | NF    | NF    | 22.13 | NF    |
| 429996 | T | -CTTCTTCTTCTTCTTCTTCTA | INDEL | MgPar9 | 48.08 | NF    | NF    | NF    | 23.36 | 69.40 | NF    |
| 429999 | T | A                      | SNP   | MgPar9 | 53.60 | 57.75 | NF    | 51.73 | 57.07 | 73.49 | 51.20 |
| 430002 | T | A                      | SNP   | MgPar9 | 58.55 | 56.16 | 50.82 | 50.82 | 60.77 | 72.09 | 52.14 |
| 430005 | T | A                      | SNP   | MgPar9 | 56.28 | 53.61 | 49.17 | 49.17 | 57.21 | 67.94 | 48.74 |
| 430008 | T | A                      | SNP   | MgPar9 | 50.46 | 47.72 | 45.04 | 45.04 | 50.76 | 58.63 | NF    |
| 430011 | T | A                      | SNP   | MgPar9 | 46.57 | 43.81 | 40.12 | 40.12 | 43.47 | 52.14 | NF    |
| 430014 | T | A                      | SNP   | MgPar9 | 40.56 | 39.78 | 35.60 | 35.60 | 37.24 | 42.28 | 36.30 |
| 430017 | A | T                      | SNP   | MgPar9 | 55.62 | NF    | NF    | NF    | 66.96 | 89.70 | NF    |
| 432007 | A | C                      | SNP   | MG_340 | 99.81 | 100   | 100   | 100   | 99.88 | 100   | 99.87 |
| 447366 | A | G                      | SNP   | MG_349 | 75.77 | 100   | 99.15 | 99.15 | 99.57 | 100   | 100   |
| 580070 | A | +AAATACT               | INDEL | IGR    | NF    | NF    | NF    | NF    | 25.00 | NF    | NF    |
| 580073 | A | T                      | SNP   | IGR    | 33.33 | NF    | NF    | NF    | 32.14 | 50.00 | NF    |
| 580075 | A | G                      | SNP   | IGR    | NF    | NF    | NF    | NF    | 45.00 | NF    | NF    |
| 580076 | C | T                      | SNP   | IGR    | 42.86 | NF    | NF    | NF    | NF    | NF    | NF    |

**Table S4.** Differentially expressed proteins in a *mraZ* background. The Area Under the Curve (AUC) for the three best peptides of the proteins in the three strains is specified as well as the Fold Change (FC) with respect to the G37 strain. The gene name is stated when characterized. Only proteins with a biologically significant fold change (>2, <0.5) compared to the G37 strain were considered and these values are highlighted in bold. ND stands for Not Detected.

| Overexpressed  |             |                                                  |                      |                      |              |                      |              |
|----------------|-------------|--------------------------------------------------|----------------------|----------------------|--------------|----------------------|--------------|
| Locus tag      | Gene        | Gene product                                     | G37                  | <i>mraZ</i>          | <i>mraW</i>  |                      |              |
|                |             |                                                  | AUC                  | AUC                  | FC           | AUC                  | FC           |
| MG_224         | <i>ftsZ</i> | Cell division protein <i>ftsZ</i>                | 4.40·10 <sup>6</sup> | 1.10·10 <sup>8</sup> | <b>24.96</b> | 8.50·10 <sup>6</sup> | 1.93         |
| MG_222         | <i>mraW</i> | Ribosomal RNA small subunit methyltransferase H  | 4.17·10 <sup>7</sup> | 5.95·10 <sup>8</sup> | <b>14.28</b> | ND                   | –            |
| MG_091         | <i>ssb</i>  | Single-stranded DNA-binding protein              | 1.10·10 <sup>7</sup> | 1.53·10 <sup>8</sup> | <b>13.94</b> | 1.38·10 <sup>8</sup> | <b>12.58</b> |
| MG_516         |             | UPF0154 protein                                  | 7.70·10 <sup>6</sup> | 5.65·10 <sup>7</sup> | <b>7.34</b>  | 4.90·10 <sup>6</sup> | 0.64         |
| MG_306         |             | Uncharacterized membrane protein                 | 3.10·10 <sup>6</sup> | 1.65·10 <sup>7</sup> | <b>5.32</b>  | 6.80·10 <sup>6</sup> | <b>2.19</b>  |
| MG_318         | <i>p32</i>  | P32 adhesin                                      | 1.54·10 <sup>8</sup> | 6.57·10 <sup>8</sup> | <b>4.28</b>  | 1.51·10 <sup>8</sup> | 0.99         |
| MG_042         | <i>potA</i> | Spermidine/putrescine import ATP-binding protein | 3.65·10 <sup>7</sup> | 1.23·10 <sup>8</sup> | <b>3.38</b>  | 9.18·10 <sup>7</sup> | <b>2.52</b>  |
| MG_233         |             | Uncharacterized protein                          | 8.40·10 <sup>6</sup> | 2.60·10 <sup>7</sup> | <b>3.10</b>  | 3.85·10 <sup>7</sup> | <b>4.58</b>  |
| MG_326         |             | DegV domain-containing protein                   | 5.22·10 <sup>7</sup> | 1.04·10 <sup>8</sup> | <b>2.00</b>  | 4.82·10 <sup>7</sup> | 0.92         |
| Underexpressed |             |                                                  |                      |                      |              |                      |              |
| Locus tag      | Gene        | Gene product                                     | G37                  | <i>mraZ</i>          | <i>mraW</i>  |                      |              |
|                |             |                                                  | AUC                  | AUC                  | FC           | AUC                  | FC           |
| MG_261         | <i>dnaE</i> | DNA polymerase III subunit alpha                 | 3.48·10 <sup>7</sup> | 1.69·10 <sup>7</sup> | <b>0.48</b>  | 2.27·10 <sup>7</sup> | 0.65         |
| MG_445         | <i>trmD</i> | tRNA (guanine-N(1)-)-methyltransferase           | 4.66·10 <sup>7</sup> | 2.20·10 <sup>7</sup> | <b>0.47</b>  | 3.28·10 <sup>7</sup> | 0.70         |
| MG_075         |             | Uncharacterized protein                          | 1.92·10 <sup>8</sup> | 8.83·10 <sup>7</sup> | <b>0.46</b>  | 1.10·10 <sup>8</sup> | 0.57         |
| MG_460         | <i>ldh</i>  | L-lactate dehydrogenase                          | 5.57·10 <sup>9</sup> | 2.47·10 <sup>9</sup> | <b>0.44</b>  | 2.55·10 <sup>9</sup> | <b>0.46</b>  |
| MG_077         | <i>oppB</i> | Oligopeptide transport system permease protein   | 9.22·10 <sup>7</sup> | 3.88·10 <sup>7</sup> | <b>0.42</b>  | 4.50·10 <sup>7</sup> | <b>0.49</b>  |
| MG_320         |             | Uncharacterized membrane protein                 | 3.85·10 <sup>7</sup> | 1.36·10 <sup>7</sup> | <b>0.35</b>  | 3.55·10 <sup>7</sup> | 0.92         |
| MG_068         |             | Uncharacterized lipoprotein                      | 1.41·10 <sup>7</sup> | 2.70·10 <sup>6</sup> | <b>0.19</b>  | ND                   | –            |
| MG_289         | <i>p37</i>  | High affinity transport system protein p37       | 1.14·10 <sup>8</sup> | 1.83·10 <sup>7</sup> | <b>0.16</b>  | 8.17·10 <sup>7</sup> | 0.72         |

**Table S5.** Proteins detected in the *mraZ* mutant and not in the wild-type strain and vice versa.

| Detected in <i>mraZ</i> and not in G37 |             |                                                          |     |                   |                   |
|----------------------------------------|-------------|----------------------------------------------------------|-----|-------------------|-------------------|
| Locus tag                              | Gene        | Gene product                                             | G37 | <i>mraZ</i>       | <i>mraW</i>       |
|                                        |             |                                                          | AUC | AUC               | AUC               |
| MG_027                                 | <i>nusB</i> | Transcription termination/antitermination protein        | ND  | $9.20 \cdot 10^7$ | $6.70 \cdot 10^7$ |
| MG_452                                 |             | Uncharacterized membrane protein                         | ND  | $4.03 \cdot 10^7$ | ND                |
| MG_044                                 | <i>potC</i> | Spermidine/putrescine transport system permease protein  | ND  | $1.70 \cdot 10^7$ | ND                |
| MG_057                                 | <i>rnmV</i> | Ribonuclease M5                                          | ND  | $1.40 \cdot 10^7$ | ND                |
| MG_011                                 |             | Uncharacterized protein                                  | ND  | $1.28 \cdot 10^7$ | ND                |
| MG_447                                 |             | Uncharacterized membrane protein                         | ND  | $1.20 \cdot 10^7$ | $9.30 \cdot 10^6$ |
| MG_223                                 |             | Uncharacterized protein                                  | ND  | $7.88 \cdot 10^6$ | ND                |
| MG_463                                 | <i>rsmA</i> | Ribosomal RNA small subunit methyltransferase A          | ND  | $6.90 \cdot 10^6$ | ND                |
| MG_360                                 |             | DNA polymerase involved in DNA repair                    | ND  | $6.85 \cdot 10^6$ | $7.00 \cdot 10^6$ |
| MG_477                                 |             | Uncharacterized protein                                  | ND  | $6.60 \cdot 10^6$ | ND                |
| MG_411                                 |             | Phosphate transport system permease protein PstA homolog | ND  | $6.30 \cdot 10^6$ | ND                |
| MG_043                                 | <i>potB</i> | Spermidine/putrescine transport system permease protein  | ND  | $3.15 \cdot 10^6$ | $1.30 \cdot 10^6$ |

  

| Detected in G37 and not in <i>mraZ</i> |             |                                                                 |                   |             |                   |
|----------------------------------------|-------------|-----------------------------------------------------------------|-------------------|-------------|-------------------|
| Locus tag                              | Gene        | Gene product                                                    | G37               | <i>mraZ</i> | <i>mraW</i>       |
|                                        |             |                                                                 | AUC               | AUC         | AUC               |
| MG_221                                 | <i>mraZ</i> | Transcriptional regulator MraZ                                  | $4.12 \cdot 10^8$ | ND          | $4.65 \cdot 10^8$ |
| MG_226                                 |             | Amino acid-polyamine-organocation (APC) permease family protein | $1.80 \cdot 10^7$ | ND          | ND                |
| MG_147                                 |             | Uncharacterized membrane protein                                | $7.80 \cdot 10^6$ | ND          | $8.40 \cdot 10^6$ |
| MG_440                                 |             | Uncharacterized lipoprotein                                     | $4.40 \cdot 10^6$ | ND          | ND                |

**Table S6.** Differentially expressed proteins in the *mraW* mutant. Only proteins with a biologically significant fold change (>2, <0.5) compared to the G37 strain were considered and these values are highlighted in bold. AUC stands for Area Under the Curve.

| Overexpressed |              |                                                  |                   |                   |              |                   |              |
|---------------|--------------|--------------------------------------------------|-------------------|-------------------|--------------|-------------------|--------------|
| Locus tag     | Gene         | Gene product                                     | G37               | <i>mraZ</i>       | <i>mraW</i>  |                   |              |
|               |              |                                                  | AUC               | AUC               | FC           | AUC               | FC           |
| MG_091        | <i>ssb</i>   | Single stranded DNA binding protein              | $1.10 \cdot 10^7$ | $1.53 \cdot 10^8$ | <b>13.94</b> | $1.38 \cdot 10^8$ | <b>12.58</b> |
| MG_233        |              | Uncharacterized protein                          | $8.40 \cdot 10^6$ | $2.60 \cdot 10^7$ | <b>3.10</b>  | $3.85 \cdot 10^7$ | <b>4.58</b>  |
| MG_042        | <i>potA</i>  | Spermidine/putrescine import ATP-binding protein | $3.65 \cdot 10^7$ | $1.23 \cdot 10^8$ | <b>3.38</b>  | $9.18 \cdot 10^7$ | <b>2.52</b>  |
| MG_306        |              | Uncharacterized membrane protein                 | $3.10 \cdot 10^6$ | $1.65 \cdot 10^7$ | <b>5.32</b>  | $6.80 \cdot 10^6$ | <b>2.19</b>  |
| MG_473        | <i>rpmG2</i> | 50S ribosomal protein L33 type 2                 | $2.70 \cdot 10^7$ | $4.85 \cdot 10^7$ | 1.80         | $5.80 \cdot 10^7$ | <b>2.15</b>  |

  

| Underexpressed |              |                                                              |                   |                   |             |                   |             |
|----------------|--------------|--------------------------------------------------------------|-------------------|-------------------|-------------|-------------------|-------------|
| Locus tag      | Gene         | Gene product                                                 | G37               | <i>mraZ</i>       | <i>mraW</i> |                   |             |
|                |              |                                                              | AUC               | AUC               | FC          | AUC               | FC          |
| MG_179         | <i>ecfA1</i> | Energy-coupling factor transporter ATP-binding protein EcfA1 | $1.24 \cdot 10^8$ | $9.70 \cdot 10^7$ | 0.78        | $6.13 \cdot 10^7$ | <b>0.50</b> |
| MG_077         | <i>oppB</i>  | Oligopeptide transport system permease protein               | $9.22 \cdot 10^7$ | $3.88 \cdot 10^7$ | <b>0.42</b> | $4.50 \cdot 10^7$ | <b>0.49</b> |
| MG_332         |              | Uncharacterized protein                                      | $1.92 \cdot 10^8$ | $1.60 \cdot 10^8$ | 0.83        | $9.37 \cdot 10^7$ | <b>0.49</b> |
| MG_250         | <i>dnaG</i>  | DNA primase                                                  | $3.08 \cdot 10^7$ | $2.47 \cdot 10^7$ | 0.80        | $1.49 \cdot 10^7$ | <b>0.48</b> |
| MG_373         |              | Uncharacterized protein                                      | $6.00 \cdot 10^7$ | $6.10 \cdot 10^7$ | 1.02        | $2.87 \cdot 10^7$ | <b>0.48</b> |
| MG_206         | <i>uvrC</i>  | UvrABC system protein C                                      | $4.53 \cdot 10^7$ | $3.67 \cdot 10^7$ | 0.81        | $2.14 \cdot 10^7$ | <b>0.47</b> |
| MG_366         |              | Uncharacterized protein                                      | $1.90 \cdot 10^7$ | $1.63 \cdot 10^7$ | 0.86        | $8.93 \cdot 10^6$ | <b>0.47</b> |
| MG_197         | <i>rpmI</i>  | 50S ribosomal protein L35                                    | $2.80 \cdot 10^8$ | $2.30 \cdot 10^8$ | 0.82        | $1.31 \cdot 10^8$ | <b>0.47</b> |
| MG_304         |              | Putative ABC transporter ATP-binding protein                 | $2.27 \cdot 10^7$ | $1.38 \cdot 10^7$ | 0.61        | $1.04 \cdot 10^7$ | <b>0.46</b> |
| MG_460         | <i>ldh</i>   | L-lactate dehydrogenase                                      | $5.57 \cdot 10^9$ | $2.47 \cdot 10^9$ | <b>0.44</b> | $2.55 \cdot 10^9$ | <b>0.46</b> |
| MG_388         | <i>ybeY</i>  | Endoribonuclease YbeY                                        | $1.30 \cdot 10^7$ | $1.10 \cdot 10^7$ | 0.85        | $5.80 \cdot 10^6$ | <b>0.45</b> |
| MG_047         | <i>metK</i>  | S-adenosylmethionine synthase, AdoMet synthase               | $6.75 \cdot 10^7$ | $4.02 \cdot 10^7$ | 0.60        | $3.00 \cdot 10^7$ | <b>0.44</b> |
| MG_252         |              | Uncharacterized tRNA/rRNA methyltransferase                  | $5.18 \cdot 10^7$ | $2.98 \cdot 10^7$ | 0.58        | $2.27 \cdot 10^7$ | <b>0.44</b> |
| MG_040         |              | Uncharacterized lipoprotein                                  | $5.07 \cdot 10^8$ | $3.27 \cdot 10^8$ | 0.64        | $2.13 \cdot 10^8$ | <b>0.42</b> |
| MG_103         |              | Probable transcriptional regulator WhiA                      | $1.66 \cdot 10^7$ | $1.16 \cdot 10^7$ | 0.70        | $6.90 \cdot 10^6$ | <b>0.42</b> |
| MG_024         | <i>yehF</i>  | Ribosome-binding ATPase                                      | $8.12 \cdot 10^7$ | $4.13 \cdot 10^7$ | 0.51        | $3.33 \cdot 10^7$ | <b>0.41</b> |

**Table S7.** Subset of proteins above the detection threshold in *mraW* and not detected in G37 and vice versa.

| Detected in <i>mraW</i> and not in G37 |             |                                                                 |                   |                   |                   |
|----------------------------------------|-------------|-----------------------------------------------------------------|-------------------|-------------------|-------------------|
| Locus tag                              | Gene        | Gene product                                                    | G37               | <i>mraZ</i>       | <i>mraW</i>       |
|                                        |             |                                                                 | AUC               | AUC               | AUC               |
| MG_027                                 | <i>nusB</i> | Transcription termination/antitermination protein               | ND                | $9.20 \cdot 10^7$ | $6.70 \cdot 10^7$ |
| MG_447                                 |             | Uncharacterized membrane protein                                | ND                | $1.20 \cdot 10^7$ | $9.30 \cdot 10^6$ |
| MG_521                                 |             | Uncharacterized membrane protein                                | ND                | ND                | $9.30 \cdot 10^6$ |
| MG_360                                 |             | DNA polymerase involved in DNA repair                           | ND                | $6.85 \cdot 10^6$ | $7.00 \cdot 10^6$ |
| MG_358                                 | <i>ruvA</i> | Holliday junction ATP-dependent DNA helicase RuvA               | ND                | ND                | $6.90 \cdot 10^6$ |
| MG_291                                 | <i>p69</i>  | ABC transport system permease protein p69                       | ND                | ND                | $4.80 \cdot 10^6$ |
| MG_339                                 | <i>recA</i> | Protein RecA                                                    | ND                | ND                | $3.70 \cdot 10^6$ |
| MG_043                                 | <i>potB</i> | Spermidine/putrescine transport system permease protein         | ND                | $3.15 \cdot 10^6$ | $1.30 \cdot 10^6$ |
| Detected in G37 and not in <i>mraW</i> |             |                                                                 |                   |                   |                   |
| Locus tag                              | Gene        | Gene product                                                    | G37               | <i>mraZ</i>       | <i>mraW</i>       |
|                                        |             |                                                                 | AUC               | AUC               | AUC               |
| MG_222                                 | <i>mraW</i> | Ribosomal RNA small subunit methyltransferase H                 | $4.17 \cdot 10^7$ | $5.95 \cdot 10^8$ | ND                |
| MG_184                                 |             | Uncharacterized adenine-specific methylase                      | $2.40 \cdot 10^7$ | $1.50 \cdot 10^7$ | ND                |
| MG_226                                 |             | Amino acid-polyamine-organocation (APC) permease family protein | $1.80 \cdot 10^7$ | ND                | ND                |
| MG_068                                 |             | Uncharacterized lipoprotein                                     | $1.41 \cdot 10^7$ | $2.70 \cdot 10^6$ | ND                |
| MG_294                                 |             | Uncharacterized protein                                         | $1.27 \cdot 10^7$ | $1.50 \cdot 10^7$ | ND                |
| MG_293                                 |             | Glycerophosphoryl diester phosphodiesterase family protein      | $1.18 \cdot 10^7$ | $6.85 \cdot 10^6$ | ND                |
| MG_505                                 |             | Putative pre-16S rRNA nuclease                                  | $1.02 \cdot 10^7$ | $1.30 \cdot 10^7$ | ND                |
| MG_440                                 |             | Uncharacterized lipoprotein                                     | $4.40 \cdot 10^6$ | ND                | ND                |

**A**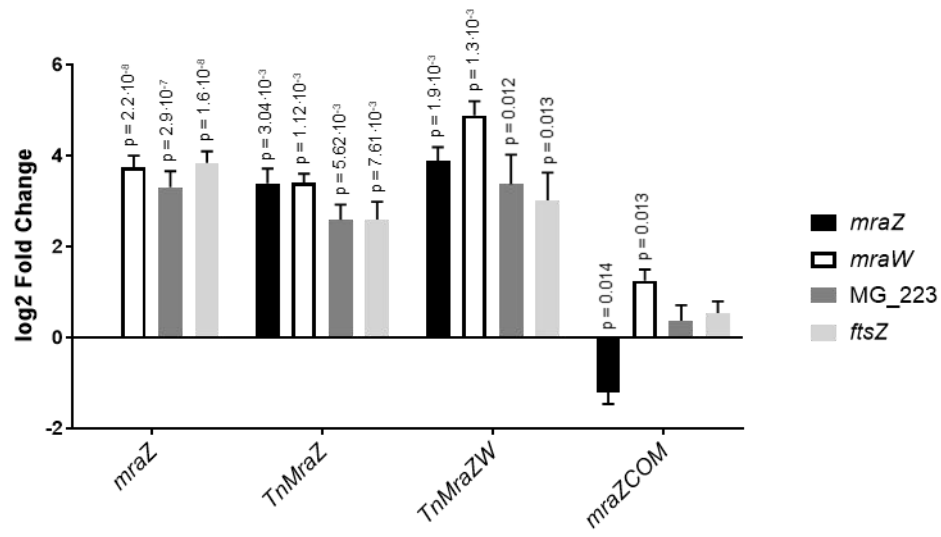**B**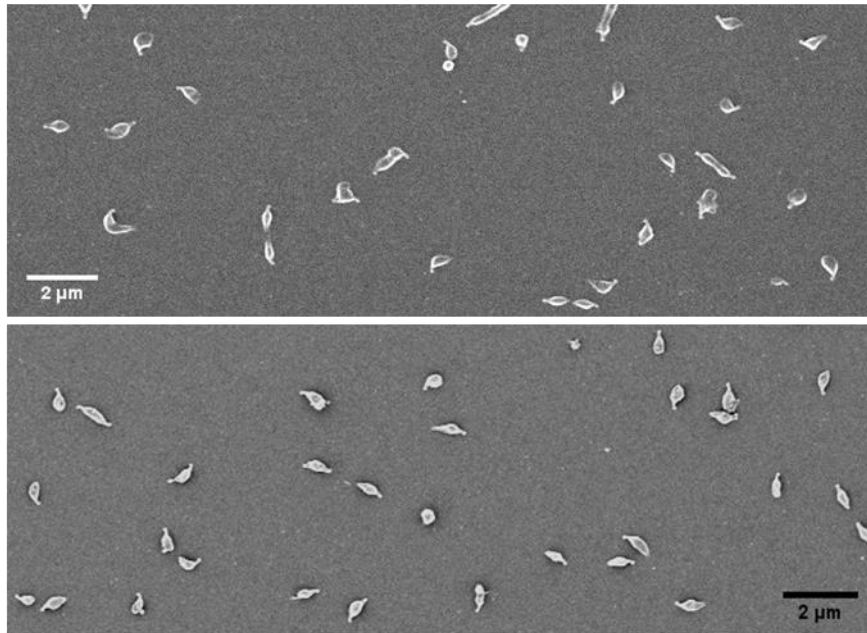**C**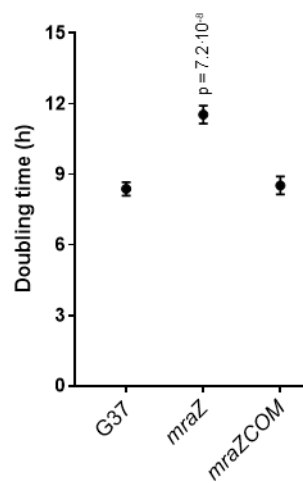**D**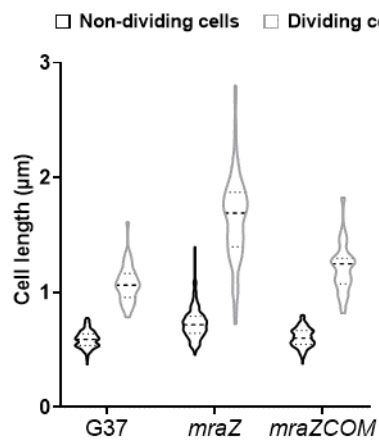**E**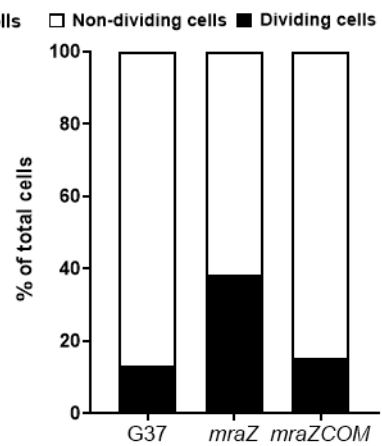



**Supplemental Figure S1.** Restoration of the wild-type phenotype after re-introducing a *mraZ* ectopic copy. **(A)** qRT-PCR data of the *mraZ* mutant, the *mraZ* mutant complemented with an ectopic copy of *mraZ* in a minitransposon (*TnMraZ*), the mutant complemented with ectopic copies of *mraZ* and *mraW* in a minitransposon (*TnMraZW*) and the strain carrying the new copy of *mraZ* after the *ftsZ* gene (*mraZCOM*). Bars represent the mean of at least three independent biological repeats. Statistically significant values assessed by a paired T-test are above the corresponding bar if biologically significant ( $\log_2$  fold change  $\pm 1$ ). **(B)** SEM micrographs of the wild-type strain (top panel) and the *mraZCOM* complemented strain (bottom panel). Scale bars represent 2  $\mu\text{m}$ . **(C)** Doubling time of the *mraZCOM* strain compared to its parental (*mraZ*) and wild-type strains. Statistical significance was assessed using a paired T-test. Significant values ( $p < 0.05$ ) are indicated above its corresponding experimentally determined value. **(D)** Length of non-dividing or dividing cells in the G37, *mraZ* and *mraZCOM* strains. Several SEM micrographs of each strain were analyzed using the ImageJ software. An average of 280 cells were measured for each strain. **(E)** Frequency of non-dividing and dividing cells as observed in SEM micrographs for the three tested strains. An average of 900 cells were analyzed for each strain.

## **References**

1. Martínez-Torró, C., Torres-Puig, S., Monge, M., Sánchez-Alba, L., González-Martín, M., Marcos-Silva, M., Perálvarez-Marín, A., Canals, F., Querol, E., Piñol, J., & Pich, O. Q. Transcriptional response to metal starvation in the emerging pathogen *Mycoplasma genitalium* is mediated by Fur-dependent and –independent regulatory pathways. *Emerging Microbes and Infections*, 9(1), 5–19 (2020).
2. Pich, O. Q., Burgos, R., Planell, R., Querol, E. & Piñol, J. Comparative analysis of antibiotic resistance gene markers in *Mycoplasma genitalium*: application to studies of the minimal gene complement. *Microbiology* 152, 519–527 (2006).
3. Kingsford, C. L., Ayanbule, K. & Salzberg, S. L. Rapid, accurate, computational discovery of Rho-independent transcription terminators illuminates their relationship to DNA uptake. *Genome Biol.* 8, R22 (2007).
4. Torres-Puig, S., Broto, A., Querol, E., Piñol, J. & Pich, O. Q. A novel sigma factor reveals a unique regulon controlling cell-specific recombination in *Mycoplasma genitalium*. *Nucleic Acids Res.* 43, 4923–4936 (2015).
5. Torres-Puig, S. *et al.* Activation of sigma20-dependent recombination and horizontal gene transfer in *Mycoplasma genitalium*. *DNA Res.* (2018). doi:10.1093/dnares/dsy011.
6. Calisto, B. M. *et al.* The EAGR box structure: a motif involved in Mycoplasma motility. *Mol. Microbiol.* 86, 382–393 (2012).
7. Burgos, R., Pich, O. Q., Ferrer-Navarro, M., Baseman, J. B., Querol, E., & Piñol, J.. Mycoplasma genitalium P140 and P110 cytidhesins are reciprocally stabilized and required for cell adhesion and terminal-organelle development. *Journal of Bacteriology*, 188(24), 8627–8637 (2006).
8. Koboldt DC, Chen K, Wylie T, Larson DE, McLellan MD, Mardis ER, Weinstock GM, Wilson RK, & Ding L VarScan: variant detection in massively parallel sequencing of individual and pooled samples. *Bioinformatics*, 25 (17), 2283-5 PMID: 19542151 (2009).
